# Supplementary material
Source: HighWire-hosted journal article supplement (https://jnis.bmj.com/content/15/e2/e190)
Supplement: inline-supplementary-material-1 [file inline-supplementary-material-1.pdf]

## Supplementary Materials

### **The ACORNS grading scale: A novel tool for the prediction of malignant brain edema after endovascular thrombectomy**

#### **RESULTS**

##### **Post-hoc sensitivity analysis**

Considering that hemorrhagic transformation may affect the assessment of MBE, we excluded the symptomatic intracranial hemorrhage (sICH) in the derivation cohort (97/914, 10.6%). Then, we were randomly assigned to either the training set (n=571) or the internal validation set (n=246). In the training cohort, we did not find the difference of the rate of MBE between the patients who received intravenous alteplase plus EVT and the patients who received EVT alone.

The logistic regression analysis showed that baseline ASPECT scores, collateral circulation, reperfusion status, and occlusion site were independent predictors for the occurrence of MBE (Table 1). The p value of the Hosmer–Lemeshow test was 0.599. The AUC was 0.843 (95% CI 0.801-0.884,  $p < 0.01$ ).

**Table I** Missing Data of The Cohorts.

|                                    | Training Cohort<br>n=643 | Internal Validation Cohort<br>n=271 | External Validation Cohort<br>n=502 |
|------------------------------------|--------------------------|-------------------------------------|-------------------------------------|
| Age, y, mean (SD)                  |                          |                                     |                                     |
| Men, n (%)                         |                          |                                     |                                     |
| Hypertension, n (%)                |                          |                                     |                                     |
| Diabetes, n (%)                    |                          |                                     |                                     |
| Atrial fibrillation, n (%)         |                          |                                     | 1                                   |
| Baseline SBP, mmHg, media (IQR)    | 3                        | 4                                   |                                     |
| Baseline DBP, mmHg, media (IQR)    | 3                        | 4                                   |                                     |
| Baseline NIHSS score, media (IQR)  |                          |                                     |                                     |
| Baseline ASPECT score, media (IQR) | 3                        |                                     |                                     |
| IVT, n (%)                         |                          |                                     |                                     |
| TOAST classification, n (%)        |                          |                                     |                                     |
| Atherosclerotic                    |                          |                                     |                                     |
| Cardioembolic                      |                          |                                     |                                     |
| Others                             |                          |                                     |                                     |
| OTP, min, media (IQR)              |                          |                                     |                                     |
| OTR, min, media (IQR)              | 3                        |                                     | 3                                   |
| Collateral status, n (%)           |                          |                                     |                                     |
| Poor                               |                          |                                     |                                     |
| Good                               |                          |                                     |                                     |
| First treatment, n (%)             | 1                        | 2                                   |                                     |
| Rescue therapy, n (%)              | 1                        | 2                                   |                                     |
| Tandem, n (%)                      |                          |                                     |                                     |
| Occlusion site, n (%)              |                          |                                     |                                     |
| mTICI 2b-3, n (%)                  |                          |                                     |                                     |
| MBE, n (%)                         |                          |                                     |                                     |
| FBG, mmol/L, mean (SD)             | 27                       | 23                                  |                                     |
| LDL, mmol/L, mean (SD)             | 58                       | 40                                  | 90                                  |
| BUN, mmol/L, mean (SD)             | 25                       | 17                                  | 46                                  |
| Cr, $\mu$ mol/L, mean (SD)         | 25                       | 17                                  | 46                                  |

ASPECT indicates Alberta Stroke Program Early CT; BUN, blood urea nitrogen; Cr, creatinine; DBP, diastolic blood pressure; FBG, fast blood glucose; ICA, internal carotid artery; IVT, intravenous thrombolysis; IQR, interquartile range; LDL, low-density lipoprotein; mTICI, modified Thrombolysis in Cerebral Infarction; MCA, middle cerebral artery; MBE, malignant brain edema; NIHSS, National Institutes of Health Stroke Scale; OTP, symptom onset to groin puncture time; OTR, time from stroke onset to recanalization; SBP, systolic blood pressure; SD, standard deviation; TOAST, the Trial of ORG 10172 in Acute Stroke Treatment.

**Table II** Results of the univariable and multivariable logistic regression for MBE after EVT in the training cohort excluded sICH.

|                                    | Univariable    |                  |                   | Multivariable          |                     |                   |
|------------------------------------|----------------|------------------|-------------------|------------------------|---------------------|-------------------|
|                                    | MBE<br>n=95    | Non-MBE<br>n=476 | P Value           | Regression Coefficient | OR (95% CIs)        | P Value           |
| Age, y, mean (SD)                  | 67.8 (11.1)    | 66.0 (11.4)      | 0.137             |                        |                     |                   |
| Men, n (%)                         | 56 (58.9)      | 303 (63.7)       | 0.386             |                        |                     |                   |
| Hypertension, n (%)                | 72 (75.8)      | 311 (65.3)       | <b>0.048</b>      | 0.478                  | 1.612 (0.892-2.914) | 0.114             |
| Diabetes, n (%)                    | 16 (16.8)      | 87 (18.3)        | 0.740             |                        |                     |                   |
| Atrial fibrillation, n (%)         | 50 (52.6)      | 208 (43.7)       | 0.110             |                        |                     |                   |
| Baseline SBP, mmHg, media (IQR)    | 150 (130, 162) | 149 (129, 160)   | 0.535             |                        |                     |                   |
| Baseline DBP, mmHg, media (IQR)    | 82 (70,91)     | 81 (74, 91)      | 0.659             |                        |                     |                   |
| Baseline NIHSS score, media (IQR)  | 17 (15, 20)    | 15 (12, 19)      | <b>&lt; 0.001</b> | 0.036                  | 1.037 (0.989-1.087) | 0.131             |
| Baseline ASPECT score, media (IQR) | 8 (5, 8)       | 9 (8, 10)        | <b>&lt; 0.001</b> | -0.292                 | 0.747 (0.66-0.837)  | <b>&lt; 0.001</b> |
| IVT, n (%)                         | 26 (27.4)      | 99 (20.8)        | 0.157             |                        |                     |                   |
| TOAST classification, n (%)        |                |                  | 0.154             |                        |                     |                   |
| Atherosclerotic                    | 181 (38)       | 28 (29.5)        |                   |                        |                     |                   |
| Cardioembolic                      | 234 (49.2)     | 57 (60)          |                   |                        |                     |                   |
| Others                             | 61 (12.8)      | 10 (10.5)        |                   |                        |                     |                   |
| OTP, min, media (IQR)              | 267 (210, 336) | 273 (216, 350)   | 0.381             |                        |                     |                   |
| OTR, min, media (IQR)              | 370 (292, 453) | 351 (287, 445)   | 0.389             |                        |                     |                   |
| Collateral status, n (%)           |                |                  | <b>&lt; 0.001</b> | -1.234                 | 0.291 (0.156-0.543) | <b>&lt; 0.001</b> |
| Poor                               | 79 (83.2)      | 225 (47.3)       |                   |                        |                     |                   |
| Good                               | 16 (16.8)      | 251 (52.7)       |                   |                        |                     |                   |
| First-line treatment, n (%)        |                |                  | 0.234             |                        |                     |                   |
| Stent retriever                    | 63 (67)        | 312 (65.8)       |                   |                        |                     |                   |
| Contact aspiration                 | 23 (24.5)      | 94 (19.8)        |                   |                        |                     |                   |
| Angioplasty or stent               | 8 (8.5)        | 68 (14.3)        |                   |                        |                     |                   |
| mTICI 2b-3, n (%)                  | 61 (64.2)      | 410 (86.1)       | <b>&lt; 0.001</b> | -0.879                 | 0.415 (0.231-0.746) | <b>0.003</b>      |
| Tandem, n (%)                      | 13 (13.7)      | 56 (11.8)        | 0.600             |                        |                     |                   |
| Occlusion site, n (%)              |                |                  | <b>&lt; 0.001</b> |                        |                     |                   |
| MCA                                | 28 (29.5)      | 292 (61.3)       |                   | -1.115                 | 0.328 (0.190-0.565) | <b>&lt; 0.001</b> |

|                            |               |               |                   |       |                     |       |
|----------------------------|---------------|---------------|-------------------|-------|---------------------|-------|
| ICA                        | 67 (70.5)     | 184 (38.7)    |                   |       |                     |       |
| FBG, mmol/L, mean (SD)     | 8.22 (3.2)    | 6.98 (5.44)   | <b>&lt; 0.001</b> | 0.031 | 1.031 (0.994-1.070) | 0.097 |
| LDL, mmol/L, mean (SD)     | 2.37 (0.89)   | 2.38 (0.75)   | 0.647             |       |                     |       |
| BUN, mmol/L, mean (SD)     | 6.95 (4.05)   | 5.86 (2.30)   | <b>0.017</b>      | 0.078 | 1.081 (0.993-1.176) | 0.072 |
| Cr, $\mu$ mol/l, mean (SD) | 86.19 (56.04) | 80.58 (32.75) | 0.389             |       |                     |       |

ASPECT, Alberta Stroke Program Early CT; BUN, blood urea nitrogen; Cr, creatinine; CIs, confidence intervals; DBP, diastolic blood pressure; FBG, fasting blood glucose; ICA, internal carotid artery; IVT, intravenous thrombolysis; IQR, interquartile range; LDL, low-density lipoprotein; mTICI, modified thrombolysis in cerebral infarction; MCA, middle cerebral artery; MBE, malignant brain edema; NIHSS, National Institutes of Health Stroke Scale; OTP, symptom onset to groin puncture time; OTR, time from stroke onset to recanalization; OR, odds ratios; SBP, systolic blood pressure; SD, standard deviation; sICH, symptomatic intracranial hemorrhage; TOAST, the Trial of ORG 10172 in Acute Stroke.

**Table III** The MBE rates according to ACORNS scores in three cohorts.

| ACORNS<br>scores | Training Cohort |                        | Internal Validation Cohort |                        | External Validation Cohort |                        |
|------------------|-----------------|------------------------|----------------------------|------------------------|----------------------------|------------------------|
|                  | MBE<br>rate     | MBE rate<br>(95%CI), % | MBE<br>rate                | MBE rate<br>(95%CI), % | MBE<br>rate                | MBE rate<br>(95%CI), % |
| 0                | 0/6             | -                      | 0/10                       | -                      | 0/7                        | -                      |
| 1                | 0/52            | -                      | 0/19                       | -                      | 1/34                       | 2.9 (0.2-17.1)         |
| 2                | 2/67            | 3 (0.5-11.3)           | 1/23                       | 4.4 (0.2-23.9)         | 3/53                       | 5.7 (1.5-16.6)         |
| 3                | 2/83            | 2.4 (0.4-9.2)          | 1/23                       | 4.4 (0.2-23.9)         | 4/52                       | 7.7 (2.5-19.4)         |
| 4                | 6/91            | 6.6 (2.7-14.3)         | 3/41                       | 7.3 (1.9-21)           | 7/59                       | 11.9 (5.3-23.5)        |
| 5                | 12/85           | 14.1 (7.8-23.8)        | 1/28                       | 3.6 (0.1-20.2)         | 15/57                      | 26.3 (15.9-39.9)       |
| 6                | 17/64           | 26.6 (16.7-39.3)       | 8/31                       | 25.8 (12.5-44.9)       | 13/49                      | 26.5 (15.4-41.3)       |
| 7                | 22/65           | 33.9 (22.9-46.8)       | 8/32                       | 25 (12.1-43.8)         | 18/61                      | 29.5 (18.9-42.7)       |
| 8                | 24/58           | 41.4 (28.9-55)         | 4/21                       | 19.1 (6.3-42.6)        | 22/51                      | 43.1 (29.6-57.7)       |
| 9                | 23/36           | 63.9 (46.2-78.7)       | 11/17                      | 64.7 (38.6-84.7)       | 18/34                      | 52.9 (35.4-69.8)       |
| 10               | 13/20           | 65 (40.9-83.7)         | 10/14                      | 65 (40.9-84.7)         | 8/18                       | 44.4 (22.4-68.7)       |
| 11-12            | 10/11           | 90.1 (57.1-99.5)       | 9/11                       | 81.8 (47.8-96.8)       | 13/19                      | 68.4 (43.5-86.4)       |
| 13-15            | 4/5             | 80 (29.9-98.9)         | 1/1                        | 100 (54.6-100)         | 8/8                        | 100 (59.8-100)         |

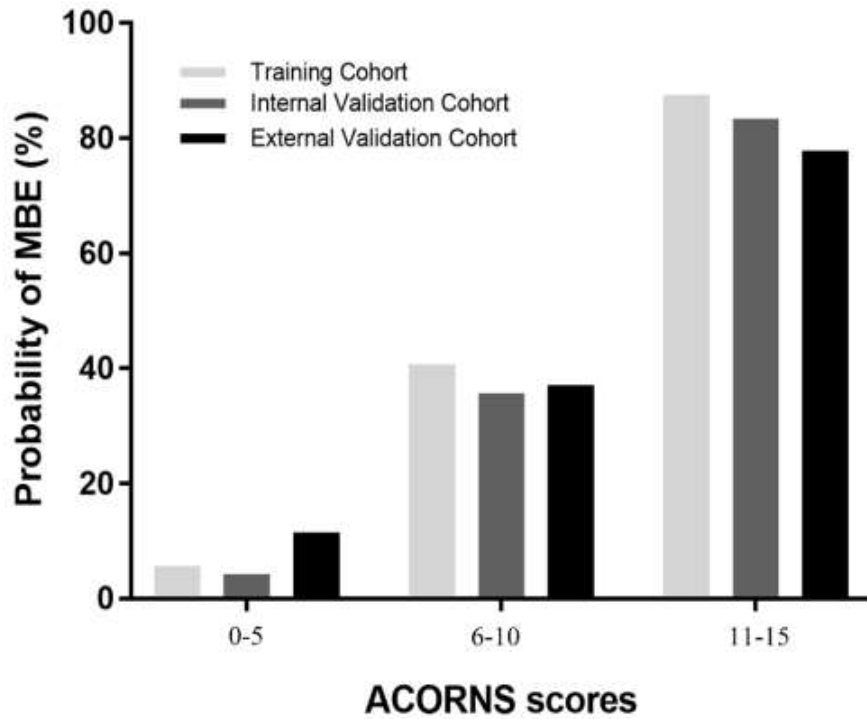

**Figure I.** Probability of MBE according to ACORNS scores. Patients were grouped according to their ACORNS scores (0–5, 6–10 and 11–15). The MBE rate increased with the ACORNS scores as in these groups.
